# Supplementary material for: Association of MGMT Promoter and Enhancer Methylation with Genetic Variants, Clinical Parameters, and Demographic Characteristics in Glioblastoma
Source: MDPI journal article supplement (doi:10.3390/cancers15245777), 2023-12-09
Supplement: s1 [file s1]

# Association of *MGMT* Promoter and Enhancer Methylation with Genetic Variants, Clinical Parameters, and Demographic Characteristics in Glioblastoma

Katja Zappe <sup>1</sup>, Katharina Pühringer <sup>1</sup>, Simon Pflug <sup>1</sup>, Daniel Berger <sup>1</sup>, Serge Weis <sup>2</sup>, Sabine Spiegl-Kreinecker <sup>3</sup>, and Margit Cichna-Markl <sup>1,\*</sup>

<sup>1</sup> Department of Analytical Chemistry, Faculty of Chemistry, University of Vienna, 1090 Vienna, Austria; katja.zappe@univie.ac.at (K.Z.); katharina.puehringer@univie.ac.at (K.P.); n12030136@students.meduniwien.ac.at (S.P.); office@berger-daniel.at (D.B.)

<sup>2</sup> Division of Neuropathology, Department of Pathology and Molecular Pathology, Kepler University Hospital GmbH, Johannes Kepler University, 4040 Linz, Austria; serge.weis@kepleruniklinikum.at

<sup>3</sup> Department of Neurosurgery, Kepler University Hospital GmbH, Johannes Kepler University, 4040 Linz, Austria; sabine.spiegl-kreinecker@kepleruniklinikum.at

\* Correspondence: margit.cichna@univie.ac.at (MCM)

**Table S1.** Clinical and demographic data of GBM patients for which stable cell cultures could not be established.

| patient | age<br>[y] | sex | KPS<br>[%] | Ki-67<br>[%] | primary<br>therapy | adjuvant<br>therapy | OS<br>[m] | PFS<br>[m] | MGMT<br>exp | MGMT<br>rs16906252 | <i>TERT</i><br>prom | <i>TERT</i><br>rs2853669 |
|---------|------------|-----|------------|--------------|--------------------|---------------------|-----------|------------|-------------|--------------------|---------------------|--------------------------|
| GBM36   | 62         | m   | 50         | ≤ 50 (25)    | none               | none                | 1.48      | n.s.       | 0.90        | CT                 | wt                  | TT                       |
| GBM37   | 63         | m   | 80         | > 50 (60)    | R-Ch-T             | ABT-414             | 19.50     | 9.01       | 0.11        | CT                 | wt                  | TT                       |
| GBM38   | 76         | m   | 30         | ≤ 50 (20)    | none               | none                | 4.44      | n.s.       | 0.29        | CC                 | wt                  | CT                       |

GBM36–38: glioblastoma multiforme patients. ABT-414: depatuxizumab mafodotin, Ch-T: chemotherapy, exp: expression, f: female, KPS: Karnofsky Performance Scale, m: male, mut: mutation, n.s.: not specified, OS: overall survival, PFS: progression-free survival, R-Ch-T: radio-chemotherapy, wt: wildtype.

**Table S2.** Interaction effects found by two-way ANOVA for significantly different (one-way ANOVA) *MGMT* promoter/enhancer methylation levels between *TERT* promoter wildtype and mutations, between *TERT* rs2853669 genotypes, and between patients with low (≤50%) and high (> 50%) Ki-67 index.

| region     | CpG   | promoter | interaction                 | F-value | p-value |
|------------|-------|----------|-----------------------------|---------|---------|
| promoter   | 72–83 | M        | <i>TERT</i> prom * age      | 3.552   | 0.030   |
| enhancer 2 | 37–39 | UM+M     | <i>TERT</i> prom * sex      | 10.034  | 0.002   |
|            |       | M        | <i>TERT</i> prom * sex      | 4.416   | 0.040   |
|            |       | M        | <i>TERT</i> prom * sex      | 5.812   | 0.030   |
| enhancer 3 | 15–22 | UM       | <i>TERT</i> prom * sex      | 4.224   | 0.042   |
|            |       | M        | <i>TERT</i> prom * age      | 37.604  | < 0.001 |
|            |       |          | <i>TERT</i> prom * sex      | 29.500  | < 0.001 |
| promoter   | 72–83 | UM+M     | <i>TERT</i> rs2853669 * sex | 27.778  | < 0.001 |
| enhancer 1 | 12–19 | UM+M     | <i>TERT</i> rs2853669 * sex | 9.562   | 0.002   |
|            |       | UM       | <i>TERT</i> rs2853669 * sex | 4.272   | 0.041   |
|            |       | M        | <i>TERT</i> rs2853669 * sex | 7.793   | 0.006   |
| enhancer 3 | 15–22 | UM       | <i>TERT</i> rs2853669 * sex | 6.032   | 0.015   |
| enhancer 4 | 19–22 | UM       | <i>TERT</i> rs2853669 * age | 7.312   | 0.009   |
| enhancer 1 | 12–19 | UM+M     | Ki-67 * sex                 | 6.315   | 0.013   |
| enhancer 2 | 05–08 | UM+M     | Ki-67 * age                 | 8.103   | 0.005   |
|            |       |          | Ki-67 * sex                 | 11.490  | 0.001   |

| region     | CpG   | promoter | interaction | F-value | p-value           |
|------------|-------|----------|-------------|---------|-------------------|
|            | 08    | UM+M     | Ki-67 * sex | 4.964   | <b>0.038</b>      |
|            | 37–39 | UM+M     | Ki-67 * age | 7.081   | <b>0.010</b>      |
|            |       |          | Ki-67 * sex | 21.309  | <b>&lt; 0.001</b> |
| enhancer 3 | 15–22 | M        | Ki-67 * sex | 9.233   | <b>0.003</b>      |

M: methylated, prom: promoter, UM: unmethylated.

**Table S3.** Non-significant main effects identified by two-way ANOVA for significantly different (one-way ANOVA) *MGMT* promoter/enhancer methylation levels between *TERT* promoter wildtype and mutations, between *TERT* rs2853669 genotypes, and between patients with low ( $\leq 50\%$ ) and high ( $> 50\%$ ) Ki-67 index.

| region     | CpG        | promoter | test                        | effect                        | one-way p-value | F-value | p-value |
|------------|------------|----------|-----------------------------|-------------------------------|-----------------|---------|---------|
| enhancer 1 | 12–19      | UM+M     | <i>TERT</i> prom * sex      | wt vs C228T vs C250T          | <b>0.033</b>    | 1.646   | 0.195   |
| enhancer 1 | 17         | UM       | <i>TERT</i> rs2853669 * age | TT vs CT                      | <b>0.042</b>    | 4.372   | 0.058   |
|            |            | M        | <i>TERT</i> rs2853669 * sex | TT vs CT                      | <b>0.039</b>    | 3.349   | 0.089   |
| enhancer 2 | mean 05–08 | M        | <i>TERT</i> rs2853669 * sex | TT vs CT                      | <b>0.037</b>    | 2.591   | 0.130   |
|            | 05         | M        | <i>TERT</i> rs2853669 * sex | TT vs CT                      | <b>0.016</b>    | 3.606   | 0.078   |
|            | 37         | M        | <i>TERT</i> rs2853669 * sex | TT vs CT                      | <b>0.017</b>    | 3.984   | 0.066   |
|            | 38         | M        | <i>TERT</i> rs2853669 * age | TT vs CT                      | <b>0.017</b>    | 4.478   | 0.053   |
|            |            |          | <i>TERT</i> rs2853669 * sex | TT vs CT                      |                 | 3.777   | 0.072   |
| enhancer 4 | 07–08      | UM       | <i>TERT</i> rs2853669 * age | TT vs CT                      | <b>0.050</b>    | 3.840   | 0.061   |
|            | 12         | UM       | <i>TERT</i> rs2853669 * age | TT vs CT                      | <b>0.050</b>    | 4.167   | 0.064   |
| promoter   | 72–83      | UM+M     | Ki-67 * sex                 | $\leq 50\%$ vs $> 50\%$ Ki-67 | <b>0.023</b>    | 0.178   | 0.673   |
| enhancer 1 | 12–19      | UM+M     | Ki-67 * age                 | $\leq 50\%$ vs $> 50\%$ Ki-67 | <b>0.029</b>    | 0.483   | 0.488   |

M: methylated, prom: promoter, UM: unmethylated
